# Supplementary material
Source: PubMed Central journal article supplement (PMC5831417)
Supplement: jamasurg-152-139-s001.pdf [file jamasurg-152-139-s001.pdf]

## Supplementary Online Content

Juo Y-Y, Mantha A, Ebrahimi R, Ziaieian B, Benharash P. Incidence of myocardial infarction after high-risk vascular operations in adults. *JAMA Surg*. Published online September 6, 2017. doi:10.1001/jamasurg.2017.3360

**eTable 1.** Preoperative Cardiac Risk Factors and Postoperative Outcomes for Open Aortic Procedures

**eTable 2.** Preoperative Cardiac Risk Factors and Postoperative Outcomes for Peripheral Bypass Procedures

**eFigure.** Temporal Trends for Major Cardiac Complications, 2005-2014

This supplementary material has been provided by the authors to give readers additional information about their work.

**eTable 1.** Preoperative Cardiac Risk Factors and Postoperative Outcomes for Open Aortic Procedures

|                                   | 2005<br>n=540 | 2006<br>n=1,490 | 2007<br>n=2,539 | 2008<br>n=2,650 | 2009<br>n=2,791 | 2010<br>n=2,715 | 2011<br>n=2,611 | 2012<br>n=2,467 | 2013<br>n=2,540 | 2014<br>n=2,464 | p-trend |
|-----------------------------------|---------------|-----------------|-----------------|-----------------|-----------------|-----------------|-----------------|-----------------|-----------------|-----------------|---------|
| Preoperative Characteristics      |               |                 |                 |                 |                 |                 |                 |                 |                 |                 |         |
| Male Gender, n (%)                | 378 (70.0%)   | 1,072 (71.9%)   | 1,821 (71.7%)   | 1,880 (70.9%)   | 1,997 (71.6%)   | 1,920 (70.7%)   | 1,834 (70.2%)   | 1,773 (71.9%)   | 1,867 (73.5%)   | 1,849 (75.0%)   | <0.01   |
| Age, mean±SD (years)              | 71.0±10.7     | 69.8±10.9       | 69.5±11.2       | 69.4±11.5       | 69.3±11.6       | 68.9±11.6       | 69.0±11.5       | 68.7±11.8       | 68.7±12.1       | 68.4±11.5       | <0.01   |
| Race                              |               |                 |                 |                 |                 |                 |                 |                 |                 |                 |         |
| White                             | 463 (85.7%)   | 1,239 (83.2%)   | 2,189 (86.2%)   | 2,231 (84.2%)   | 2,231 (83.5%)   | 2,167 (79.1%)   | 2,081 (79.6%)   | 1,959 (79.4%)   | 1,949 (76.7%)   | 1,831 (74.3%)   | <0.01   |
| Black or African American         | 30 (5.6%)     | 103 (6.9%)      | 143 (5.6%)      | 187 (7.1%)      | 221 (7.9%)      | 220 (8.0%)      | 200 (7.7%)      | 206 (8.4%)      | 190 (7.5%)      | 201 (8.2%)      |         |
| Asian or Native American          | 5 (0.9%)      | 13 (0.9%)       | 35 (1.4%)       | 40 (1.5%)       | 54 (1.9%)       | 66 (2.4%)       | 74 (2.8%)       | 76 (3.1%)       | 73 (2.9%)       | 61 (2.5%)       |         |
| Others / Unknown                  | 42 (7.8%)     | 135 (9.1%)      | 172 (6.8%)      | 192 (7.3%)      | 185 (6.6%)      | 287 (10.5%)     | 260 (9.9%)      | 226 (9.2%)      | 328 (12.9%)     | 371 (15.1%)     |         |
| BMI, mean±SD (kg/m <sup>2</sup> ) | 27.1±5.4      | 27.4±5.8        | 27.5±5.6        | 27.6±5.9        | 27.6±5.7        | 27.6±6.8        | 27.3±5.8        | 27.9±5.8        | 27.5±5.8        | 27.9±5.7        | <0.01   |
| Diabetes requiring Insulin        | 22 (4.1%)     | 66 (4.4%)       | 85 (3.4%)       | 111 (4.2%)      | 133 (4.8%)      | 142 (5.2%)      | 114 (4.4%)      | 107 (4.3%)      | 91 (3.6%)       | 101 (4.1%)      | 0.94    |
| Hypertension                      | 438 (81.3%)   | 1,186 (79.6%)   | 2,012 (79.24%)  | 2,109 (79.6%)   | 2,221 (79.6%)   | 2,155 (78.7%)   | 2,057 (78.7%)   | 1,898 (76.9%)   | 1,908 (75.1%)   | 1,818 (73.8%)   | <0.01   |

|                                 |                |                |                  |                  |                  |                  |                  |                  |                  |                  |       |
|---------------------------------|----------------|----------------|------------------|------------------|------------------|------------------|------------------|------------------|------------------|------------------|-------|
| Anemia                          | 191<br>(35.4%) | 556<br>(37.3%) | 950<br>(37.4%)   | 1,034<br>(39.0%) | 1,108<br>(39.7%) | 1,124<br>(41.0%) | 1,040<br>(39.8%) | 925<br>(37.5%)   | 951<br>(37.4%)   | 922<br>(37.4%)   | 0.89  |
| Renal Insufficiency             | 157<br>(29.1%) | 352<br>(23.6%) | 614<br>(24.2%)   | 651<br>(24.6%)   | 638<br>(22.9%)   | 624<br>(22.8%)   | 553<br>(21.2%)   | 502<br>(20.35%)  | 540<br>(21.3%)   | 508<br>(20.6%)   | <0.01 |
| Dialysis                        | 16<br>(3.0%)   | 29<br>(2.0%)   | 66<br>(2.6%)     | 89<br>(3.4%)     | 95<br>(3.4%)     | 93<br>(3.5%)     | 103<br>(3.9%)    | 81<br>(3.3%)     | 96<br>(3.8%)     | 106<br>(4.3%)    | <0.01 |
| h/o CHF                         | 9<br>(1.7%)    | 35<br>(2.4%)   | 43<br>(1.7%)     | 45<br>(1.7%)     | 56<br>(2.0%)     | 71<br>(2.6%)     | 67<br>(2.6%)     | 51<br>(2.1%)     | 64<br>(2.5%)     | 65<br>(2.6%)     | 0.01  |
| h/o MI                          | 15<br>(2.8%)   | 30<br>(2.0%)   | 68<br>(2.7%)     | 54<br>(2.0%)     | 65<br>(2.3%)     | 70<br>(2.6%)     | 35<br>(2.5%)     | 17<br>(2.2%)     | N/A              | N/A              | 0.86  |
| h/o Stroke                      | 85<br>(15.7%)  | 231<br>(15.5%) | 371<br>(14.6%)   | 407<br>(15.4%)   | 419<br>(15.0%)   | 412<br>(15.0%)   | 181<br>(6.9%)    | 128<br>(5.2%)    | N/A              | N/A              | 0.28  |
| ASA Class                       |                |                |                  |                  |                  |                  |                  |                  |                  |                  |       |
| I                               | 1<br>(0.2%)    | 6<br>(0.4%)    | 8<br>(0.3%)      | 8<br>(0.3%)      | 18<br>(0.7%)     | 13<br>(0.5%)     | 10<br>(0.4%)     | 8<br>(0.3%)      | 14<br>(0.6%)     | 8<br>(0.3%)      | <0.01 |
| II                              | 58<br>(10.7%)  | 120<br>(8.1%)  | 188<br>(7.4%)    | 205<br>(7.8%)    | 204<br>(7.3%)    | 198<br>(7.3%)    | 168<br>(6.4%)    | 178<br>(7.2%)    | 198<br>(7.8%)    | 148<br>(6.0%)    |       |
| III                             | 324<br>(60.0%) | 891<br>(59.8%) | 1,473<br>(58.1%) | 1,501<br>(56.8%) | 1,582<br>(56.7%) | 1,505<br>(55.1%) | 1,418<br>(54.4%) | 1,280<br>(54.0%) | 1,278<br>(50.5%) | 1,220<br>(49.7%) |       |
| IV                              | 132<br>(24.4%) | 401<br>(26.9%) | 765<br>(30.2%)   | 798<br>(30.2%)   | 856<br>(30.7%)   | 902<br>(33.0%)   | 905<br>(34.7%)   | 873<br>(35.5%)   | 876<br>(34.6%)   | 918<br>(37.4%)   |       |
| V                               | 25<br>(4.6%)   | 72<br>(4.8%)   | 101<br>(4.0%)    | 133<br>(5.0%)    | 130<br>(4.7%)    | 114<br>(4.2%)    | 108<br>(4.1%)    | 121<br>(4.9%)    | 165<br>(6.5%)    | 162<br>(6.6%)    |       |
| Dependent Functional Status     | 86<br>(15.9%)  | 219<br>(14.7%) | 344<br>(13.6%)   | 353<br>(13.3%)   | 379<br>(13.6%)   | 297<br>(10.8%)   | 161<br>(6.2%)    | 92<br>(3.7%)     | 95<br>(3.7%)     | 70<br>(2.8%)     | <0.01 |
| MICA Risk Estimate, mean±SD (%) | 4.3±6.2        | 4.0±5.7        | 4.0±5.3          | 4.2±5.9          | 4.0±5.2          | 3.9±4.9          | 3.5±4.0          | 3.4±3.4          | 3.6±3.8          | 3.6±3.6          | 0.14  |
| Emergent Procedure              | 98<br>(18.2%)  | 315<br>(21.1%) | 511<br>(20.1%)   | 543<br>(20.5%)   | 559<br>(20.0%)   | 623<br>(22.7%)   | 563<br>(21.5%)   | 512<br>(20.8%)   | 577<br>(22.7%)   | 551<br>(22.4%)   | <0.01 |

| Postoperative Outcomes |              |               |               |                |               |               |               |               |               |                |       |
|------------------------|--------------|---------------|---------------|----------------|---------------|---------------|---------------|---------------|---------------|----------------|-------|
| Myocardial Infarction  | 3<br>(0.6%)  | 18<br>(1.2%)  | 18<br>(0.7%)  | 29<br>(1.1%)   | 90<br>(3.2%)  | 82<br>(3.0%)  | 71<br>(2.7%)  | 76<br>(3.1%)  | 69<br>(2.7%)  | 76<br>(3.1%)   | 0.64* |
| Cardiac Arrest         | 10<br>(1.9%) | 40<br>(2.7%)  | 61<br>(2.4%)  | 73<br>(2.8%)   | 65<br>(2.3%)  | 78<br>(2.9%)  | 84<br>(3.2%)  | 89<br>(3.6%)  | 117<br>(4.6%) | 115<br>(4.7%)  | <0.01 |
| Mortality              | 45<br>(8.3%) | 125<br>(8.4%) | 195<br>(7.7%) | 264<br>(10.0%) | 235<br>(8.4%) | 227<br>(8.3%) | 201<br>(7.7%) | 207<br>(8.4%) | 246<br>(9.7%) | 250<br>(10.2%) | 0.04  |

\*p-trend and total incidence for MI was calculated using data 2009-2014 only.

**eTable 2.** Preoperative Cardiac Risk Factors and Postoperative Outcomes for Peripheral Bypass Procedures

|                                      | 2005<br>n=952  | 2006<br>n=3,191  | 2007<br>n=5,308  | 2008<br>n=6,428  | 2009<br>n=7,533  | 2010<br>n=7,818  | 2011<br>n=8,089  | 2012<br>n=8,588  | 2013<br>n=9,566  | 2014<br>n=9,921  | p-trend |
|--------------------------------------|----------------|------------------|------------------|------------------|------------------|------------------|------------------|------------------|------------------|------------------|---------|
| Preoperative Characteristics         |                |                  |                  |                  |                  |                  |                  |                  |                  |                  |         |
| Male Gender, n (%)                   | 599<br>(62.9%) | 1,950<br>(61.1%) | 3,271<br>(61.6%) | 3,853<br>(59.9%) | 4,637<br>(61.6%) | 4,803<br>(61.4%) | 5,047<br>(62.4%) | 5,312<br>(61.9%) | 5,998<br>(62.7%) | 6,375<br>(64.3%) | <0.01   |
| Age, mean±SD<br>(years)              | 64.7±12.7      | 66.0±12.2        | 66.8±12.0        | 67.0±12.2        | 66.7±11.9        | 66.9±11.8        | 66.7±11.5        | 66.9±11.5        | 66.9±11.3        | 66.3±11.3        | 0.35    |
| Race                                 |                |                  |                  |                  |                  |                  |                  |                  |                  |                  |         |
| White                                | 743<br>(78.1%) | 2,466<br>(77.3%) | 4,133<br>(77.9%) | 5,053<br>(78.6%) | 5,869<br>(77.9%) | 5,932<br>(75.3%) | 6,082<br>(75.1%) | 6,443<br>(75.0%) | 7,063<br>(73.8%) | 7,259<br>(73.2%) | <0.01   |
| Black or African<br>American         | 127<br>(13.3%) | 378<br>(11.9%)   | 747<br>(14.1%)   | 863<br>(13.4%)   | 1,020<br>(13.5%) | 1,077<br>(13.7%) | 1,175<br>(14.5%) | 1,164<br>(13.6%) | 1,444<br>(15.1%) | 1,508<br>(15.2%) |         |
| Asian or Native<br>American          | 11<br>(1.2%)   | 19<br>(0.6%)     | 74<br>(1.4%)     | 61<br>(1.0%)     | 130<br>(1.73%)   | 109<br>(1.4%)    | 138<br>(1.7%)    | 207<br>(2.4%)    | 195<br>(2.0%)    | 149<br>(1.5%)    |         |
| Others / Unknown                     | 71<br>(7.5%)   | 328<br>(10.3%)   | 355<br>(6.7%)    | 451<br>(7.0%)    | 515<br>(6.8%)    | 760<br>(9.7%)    | 705<br>(8.7%)    | 774<br>(9.0%)    | 864<br>(9.0%)    | 1,005<br>(10.1%) |         |
| BMI, mean±SD<br>(kg/m <sup>2</sup> ) | 26.9±6.4       | 27.2±6.2         | 26.9±6.2         | 26.9±6.2         | 27.1±6.1         | 27.3±6.4         | 27.1±6.3         | 27.3±6.1         | 27.4±6.0         | 27.5±6.0         | <0.01   |
| Diabetes requiring<br>Insulin        | 174<br>(18.3%) | 594<br>(18.6%)   | 965<br>(18.2%)   | 1,207<br>(18.8%) | 1,478<br>(19.6%) | 1,524<br>(19.4%) | 1,625<br>(20.1%) | 1,781<br>(20.7%) | 1,979<br>(20.7%) | 2,118<br>(21.4%) | <0.01   |
| Hypertension                         | 767<br>(80.6%) | 2,625<br>(82.3%) | 4,296<br>(80.9%) | 5,227<br>(81.3%) | 6,208<br>(82.4%) | 6,515<br>(82.7%) | 6,726<br>(83.0%) | 7,041<br>(82.0%) | 7,799<br>(81.5%) | 7,905<br>(79.7%) | 0.03    |

|                                 |                |                  |                  |                   |                  |                  |                  |                  |                  |                  |       |
|---------------------------------|----------------|------------------|------------------|-------------------|------------------|------------------|------------------|------------------|------------------|------------------|-------|
| Anemia                          | 446<br>(46.9%) | 1,517<br>(47.5%) | 2,440<br>(46.0%) | 3,014<br>(46.9%)  | 3,500<br>(46.5%) | 3,675<br>(46.7%) | 3,681<br>(45.4%) | 3,826<br>(44.6%) | 4,091<br>(42.8%) | 4,191<br>(42.2%) | <0.01 |
| Renal insufficiency             | 230<br>(24.2%) | 840<br>(26.3%)   | 1,162<br>(21.9%) | 1,271<br>(19.8%)  | 1,481<br>(19.7%) | 1,601<br>(20.3%) | 1,446<br>(17.9%) | 1,567<br>(18.3%) | 1,650<br>(17.3%) | 1,662<br>(18.8%) | <0.01 |
| Dialysis                        | 52<br>(5.5%)   | 197<br>(6.2%)    | 324<br>(6.1%)    | 343<br>(5.3%)     | 401<br>(5.3%)    | 420<br>(5.3%)    | 396<br>(4.9%)    | 418<br>(4.9%)    | 445<br>(4.7%)    | 405<br>(4.1%)    | <0.01 |
| h/o CHF                         | 26<br>(2.7%)   | 109<br>(3.4%)    | 138<br>(2.6%)    | 163<br>(2.5%)     | 169<br>(2.2%)    | 197<br>(2.5%)    | 200<br>(2.5%)    | 220<br>(2.6%)    | 260<br>(2.7%)    | 289<br>(2.9%)    | 0.56  |
| h/o MI                          | 30<br>(3.2%)   | 88<br>(2.8%)     | 110<br>(2.1%)    | 127<br>(2.0%)     | 172<br>(2.3%)    | 158<br>(2.0%)    | 91<br>(2.0%)     | 66<br>(2.5%)     | N/A              | N/A              | 0.16  |
| h/o Stroke                      | 179<br>(18.8%) | 584<br>(18.3%)   | 999<br>(18.8%)   | 11,242<br>(19.3%) | 1,411<br>(18.7%) | 1,506<br>(19.1%) | 711<br>(8.8%)    | 488<br>(5.7%)    | N/A              | N/A              | 0.34  |
| ASA Class                       |                |                  |                  |                   |                  |                  |                  |                  |                  |                  |       |
| I                               | 6<br>(0.6%)    | 14 (0.4%)        | 17<br>(0.3%)     | 19<br>(0.3%)      | 20<br>(0.3%)     | 16<br>(0.2%)     | 24<br>(0.3%)     | 30<br>(0.4%)     | 23<br>(0.2%)     | 17<br>(0.2%)     | <0.01 |
| II                              | 89<br>(9.4%)   | 250<br>(7.8%)    | 393<br>(7.4%)    | 440<br>(6.9%)     | 465<br>(6.2%)    | 456<br>(5.8%)    | 455<br>(5.6%)    | 413<br>(4.8%)    | 455<br>(4.8%)    | 442<br>(4.5%)    |       |
| III                             | 690<br>(72.5%) | 2,281<br>(71.5%) | 3,788<br>(71.4%) | 4,596<br>(71.5%)  | 5,370<br>(71.3%) | 5,671<br>(72.0%) | 5,715<br>(70.6%) | 5,949<br>(69.4%) | 6,600<br>(69.0%) | 6,819<br>(68.8%) |       |
| IV                              | 163<br>(17.1%) | 640<br>(20.1%)   | 1,085<br>(20.5%) | 1,351<br>(21.0%)  | 1,653<br>(22.0%) | 1,713<br>(21.8%) | 1,867<br>(23.1%) | 2,164<br>(25.2%) | 2,453<br>(25.7%) | 2,594<br>(26.2%) |       |
| V                               | 4<br>(0.4%)    | 6<br>(0.2%)      | 21<br>(0.4%)     | 19<br>(0.3%)      | 21<br>(0.3%)     | 20<br>(0.3%)     | 29<br>(0.4%)     | 22<br>(0.3%)     | 28<br>(0.3%)     | 36<br>(0.4%)     |       |
| Dependent Functional Status     | 174<br>(18.3%) | 562<br>(17.6%)   | 890<br>(16.8%)   | 1,097<br>(17.1%)  | 1,183<br>(15.7%) | 979<br>(12.4%)   | 754<br>(9.3%)    | 632<br>(7.4%)    | 682<br>(7.1%)    | 613<br>(6.2%)    | <0.01 |
| MICA Risk Estimate, mean±SD (%) | 1.3±1.4        | 1.4±1.4          | 1.4±1.6          | 1.4±1.6           | 1.4±1.4          | 1.3±1.4          | 1.3±1.3          | 1.3±1.2          | 1.3±1.2          | 1.2±1.1          | 0.07  |
| Emergent Procedure              | 93<br>(9.8%)   | 226<br>(7.1%)    | 391<br>(7.4%)    | 463<br>(7.2%)     | 550<br>(7.3%)    | 587<br>(7.5%)    | 658<br>(8.1%)    | 636<br>(7.4%)    | 716<br>(7.5%)    | 634<br>(6.4%)    | 0.05  |

| Postoperative Outcomes |              |              |               |               |               |               |               |               |               |               |       |
|------------------------|--------------|--------------|---------------|---------------|---------------|---------------|---------------|---------------|---------------|---------------|-------|
| Myocardial In-farction | 6<br>(0.6%)  | 22<br>(0.7%) | 51<br>(1.0%)  | 44<br>(0.7%)  | 189<br>(2.5%) | 169<br>(2.2%) | 165<br>(2.0%) | 205<br>(2.4%) | 193<br>(2.0%) | 226<br>(2.3%) | 0.52* |
| Cardiac Arrest         | 10<br>(1.1%) | 41<br>(1.3%) | 70<br>(1.3%)  | 71<br>(1.1%)  | 89<br>(1.2%)  | 87<br>(1.1%)  | 105<br>(1.3%) | 93<br>(1.1%)  | 96<br>(1.0%)  | 127<br>(1.3%) | 0.64  |
| Mortality              | 34<br>(3.6%) | 95<br>(3.0%) | 171<br>(3.2%) | 222<br>(3.5%) | 242<br>(3.2%) | 216<br>(2.7%) | 233<br>(2.9%) | 199<br>(2.3%) | 253<br>(2.6%) | 265<br>(2.7%) | <0.01 |

\*p-trend for MI is calculated using data 2009-2014 only.

**eFigure.** Temporal Trends for Major Cardiac Complications, 2005-2014

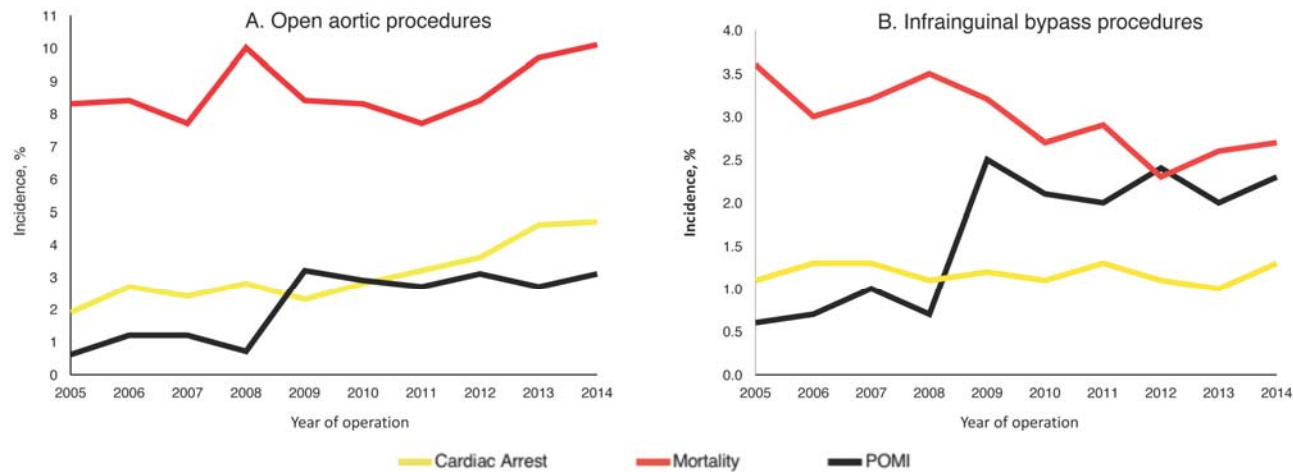

| Operation Year | Open Aortic MI | Open Aortic CA | Open Aortic Mortality | Bypass MI | Bypass CA | Bypass Mortality |
|----------------|----------------|----------------|-----------------------|-----------|-----------|------------------|
| 2005           | 0.6            | 1.9            | 8.3                   | 0.6       | 1.1       | 3.6              |
| 2006           | 1.2            | 2.7            | 8.4                   | 0.7       | 1.3       | 3                |
| 2007           | 1.2            | 2.4            | 7.7                   | 1         | 1.3       | 3.2              |
| 2008           | 0.7            | 2.8            | 10                    | 0.7       | 1.1       | 3.5              |
| 2009           | 3.2            | 2.3            | 8.4                   | 2.5       | 1.2       | 3.2              |
| 2010           | 2.9            | 2.8            | 8.3                   | 2.1       | 1.1       | 2.7              |
| 2011           | 2.7            | 3.2            | 7.7                   | 2         | 1.3       | 2.9              |
| 2012           | 3.1            | 3.6            | 8.4                   | 2.4       | 1.1       | 2.3              |
| 2013           | 2.7            | 4.6            | 9.7                   | 2         | 1         | 2.6              |
| 2014           | 3.1            | 4.7            | 10.1                  | 2.3       | 1.3       | 2.7              |

Postoperative myocardial infarction (POMI) incidence remained stable before and after the 2008-2009 change in the sampling algorithm of the American College of Surgeons National Surgical Quality Improvement Program. Mortality and cardiac arrest (CA) gradually increased in open aortic procedures (A) but decreased in infrainguinal bypass (bypass) procedures (B). MI indicates myocardial infarction.
